# Supplementary material for: A non-fullerene electron acceptor modified by thiophene-2-carbonitrile for solution-processed organic solar cells
Source: Royal Society of Chemistry journal article supplement (doi:10.1039/c6ta00056h), 2016-01-01
Supplement: c6ta00056h1.pdf [file c6ta00056h1.pdf]

Electronic Supplementary Information for:

**A non-fullerene electron acceptor modified by thiophene-2-carbonitrile for  
solution-processed organic solar cells**

Shuixing Li,<sup>a</sup> Jieli Yan,<sup>a</sup> Chang-Zhi Li,<sup>a</sup> Feng Liu,<sup>\*b,c</sup> Minmin Shi,<sup>\*a</sup> Hongzheng Chen<sup>\*a</sup> and Thomas P. Russell<sup>d</sup>

<sup>a</sup> MOE Key Laboratory of Macromolecular Synthesis and Functionalization, State Key Laboratory of Silicon Materials, & Department of Polymer Science and Engineering, Zhejiang University, Hangzhou 310027, P. R. China.

<sup>b</sup> Materials Sciences Division, Lawrence Berkeley National Laboratory, Berkeley, CA 94720, USA.

<sup>c</sup> Department of Physics and Astronomy, Shanghai jiao tong University, Shanghai, 200240, P. R. China.

<sup>d</sup> Department of Polymer Science and Engineering, University of Massachusetts, Amherst, MA 01003, USA.

**Supporting Information**

**Contents**

|                                                                                                    |    |
|----------------------------------------------------------------------------------------------------|----|
| Instrument, Materials.....                                                                         | S2 |
| TGA curve of F8-DPPTCN.....                                                                        | S3 |
| DSC curve of F8-DPPTCN, <i>J-V</i> curves at different temperatures.....                           | S4 |
| <i>J-V</i> curves at different weight ratios / amounts of DIO additives.....                       | S5 |
| <sup>1</sup> H NMR / <sup>13</sup> C NMR spectrum of F8-DPPTCN solution in CDCl <sub>3</sub> ..... | S6 |
| AFM images, References.....                                                                        | S7 |

## Instrument

$^1\text{H}$  NMR and  $^{13}\text{C}$  NMR spectra were obtained on a Bruker Advance III 400 (400 MHz) nuclear magnetic resonance spectroscope. UV-vis absorption spectra were taken on a Shimadzu UV-2450 spectrophotometer. MALDI-TOF MS spectra were measured on a Walters Maldi Q-TOF Premier mass spectrometry. Thermogravimetric analysis (TGA) was carried out on a WCT-2 thermal balance under protection of nitrogen at a heating rate of 10 °C/min. Differential scanning calorimetry (DSC) was recorded on a Pekin-Elmer Pyris 1 differential scanning calorimeter. Cyclic voltammetry (CV) was done on a CHI600A electrochemical workstation with Pt disk, Pt plate, and standard calomel electrode (SCE) as working electrode, counter electrode, and reference electrode, respectively, in a 0.1 mol/L tetrabutylammonium hexafluorophosphate ( $\text{Bu}_4\text{NPF}_6$ )  $\text{CH}_2\text{Cl}_2$  solution. The CV curves were recorded versus the potential of SCE, which was calibrated by the ferrocene-ferrocenium ( $\text{Fc}/\text{Fc}^+$ ) redox couple (4.8 eV below the vacuum level). Topographic images of the films were obtained on a Veeco MultiMode atomic force microscopy (AFM) in the tapping mode using an etched silicon cantilever at a nominal load of  $\sim 2$  nN, and the scanning rate for a  $10\text{ }\mu\text{m} \times 10\text{ }\mu\text{m}$  image size was 1.5 Hz.

## Materials

All reagents and solvents, unless otherwise specified, were purchased from Aladdin, Aldrich and J&K Scientific Ltd. and were used without further purification. P3HT (96% H-T regioregularity,  $M_n = 26$  kg/mol, polydispersity = 2.0) was

purchased from Merck Co. Poly [(9,9-bis(3'-(N,N-dimethylamino)propyl)-2,7-fluorene)-alt-2,7-(9,9-dioctylfluorene)] (PFN,  $M_n = 20.0$  kg/mol, polydispersity = 2.1) was synthesized in our lab according to the published procedure.<sup>1</sup>

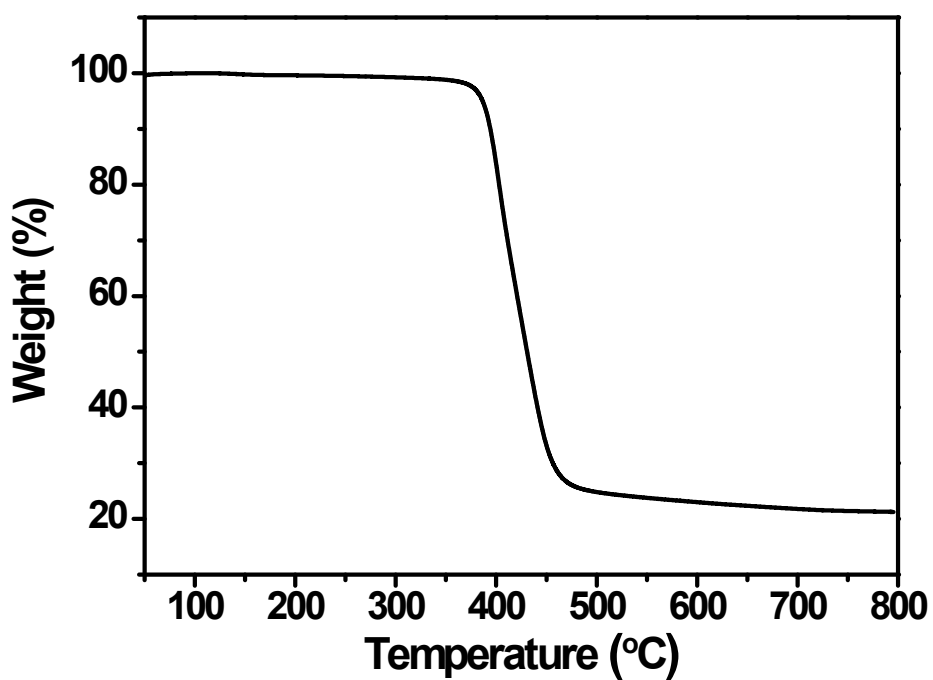

**Fig. S1** TGA curve of F8-DPPTCN.

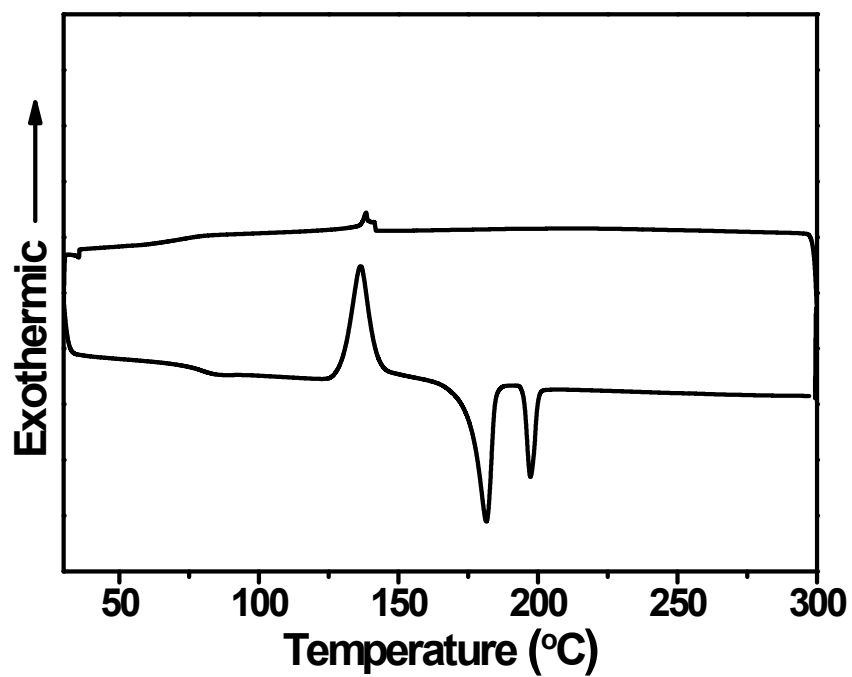

Fig. S2 DSC curve of F8-DPPTCN.

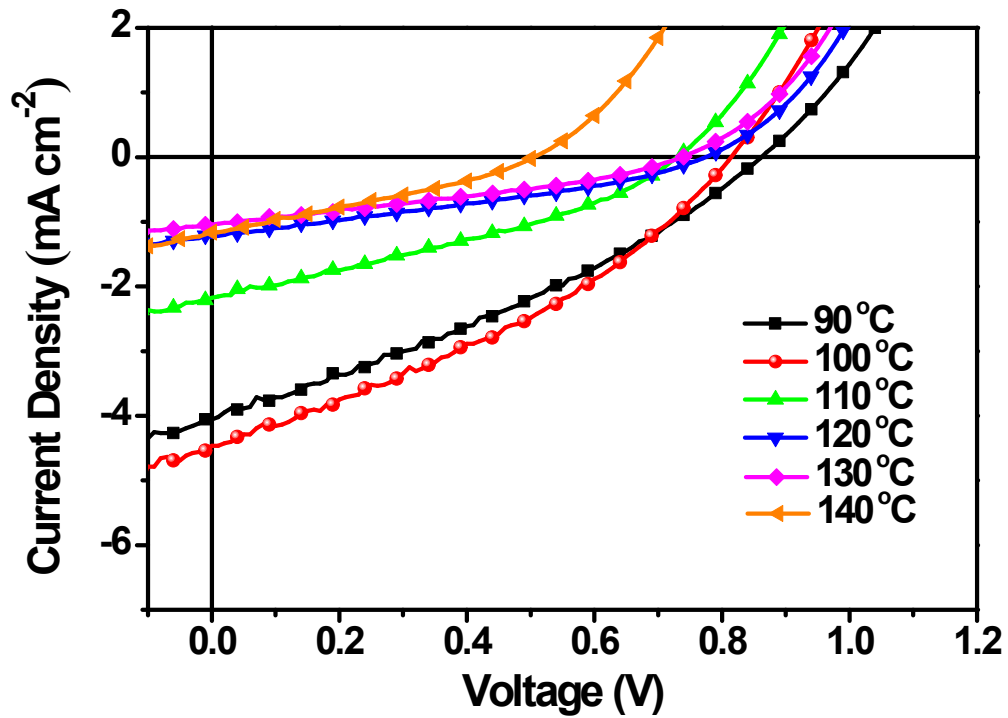

Fig. S3  $J$ - $V$  curves at different annealing temperatures (Blend ratio: 1:2).

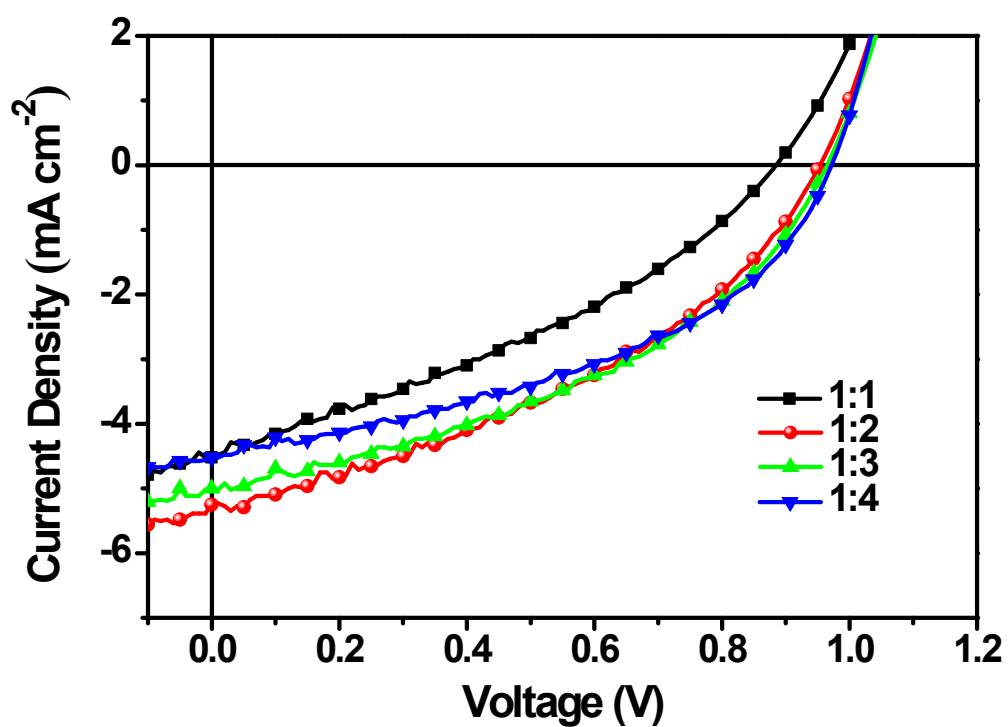

Fig. S4  $J$ - $V$  curves at different weight ratios (annealed at 95 °C).

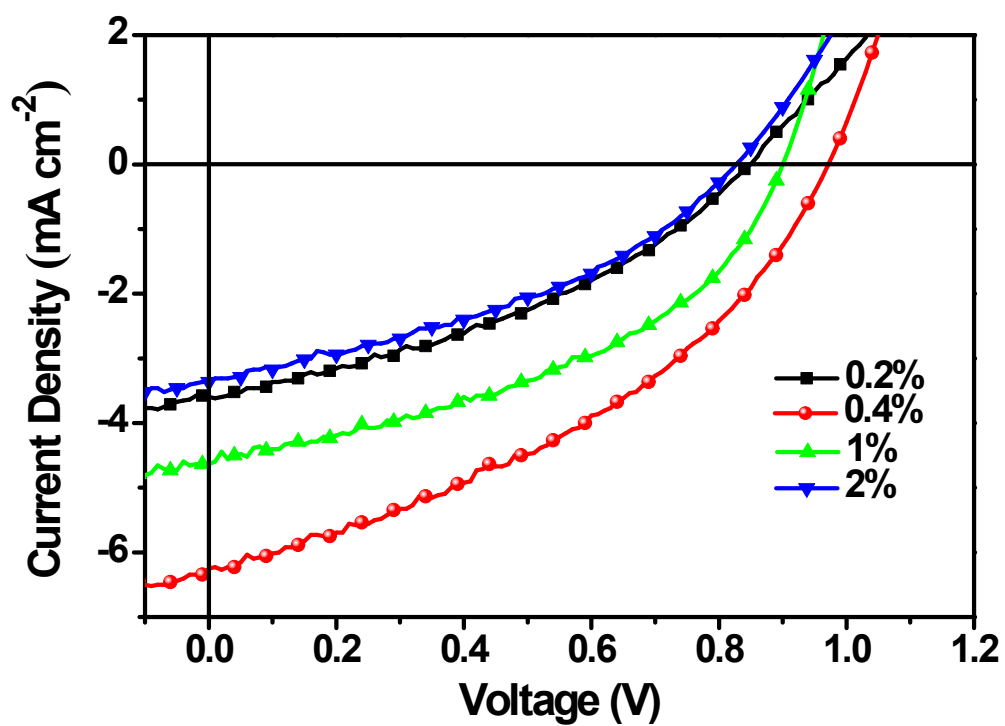

Fig. S5  $J$ - $V$  curves at different amounts of DIO additives (Blend ratio: 1:3).

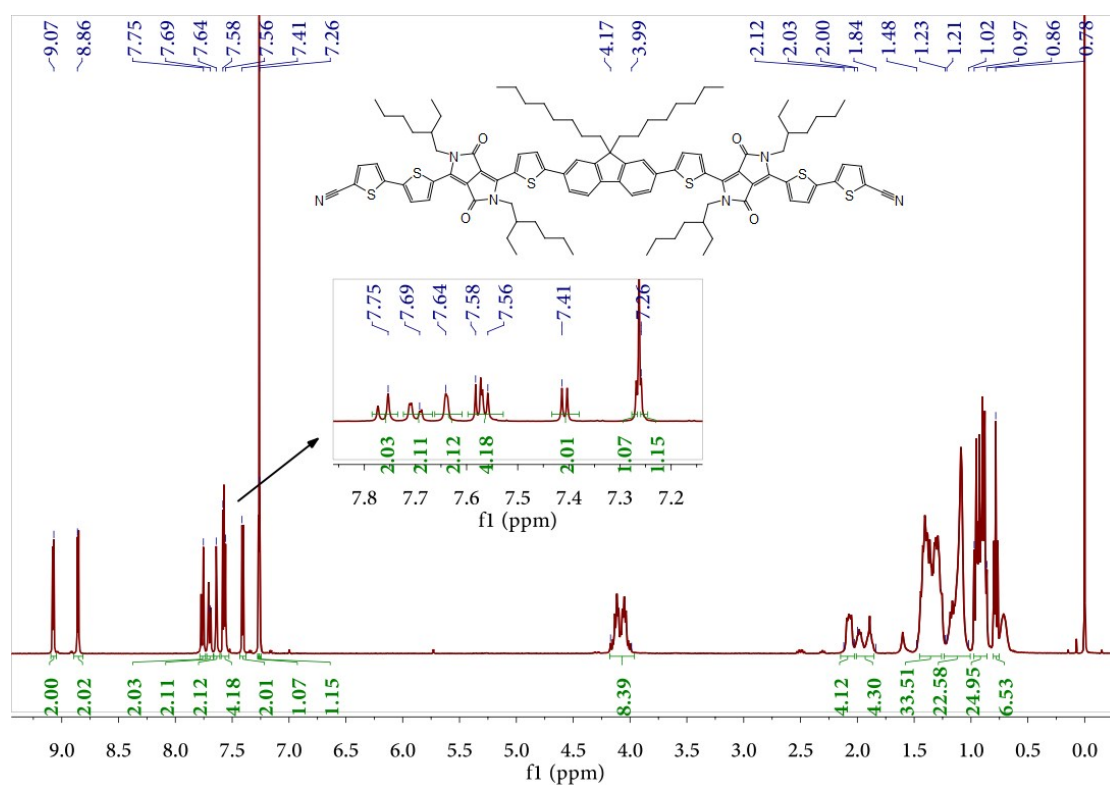

**Fig. S6**  $^1\text{H}$  NMR spectrum of F8-DPPTCN solution in  $\text{CDCl}_3$ .

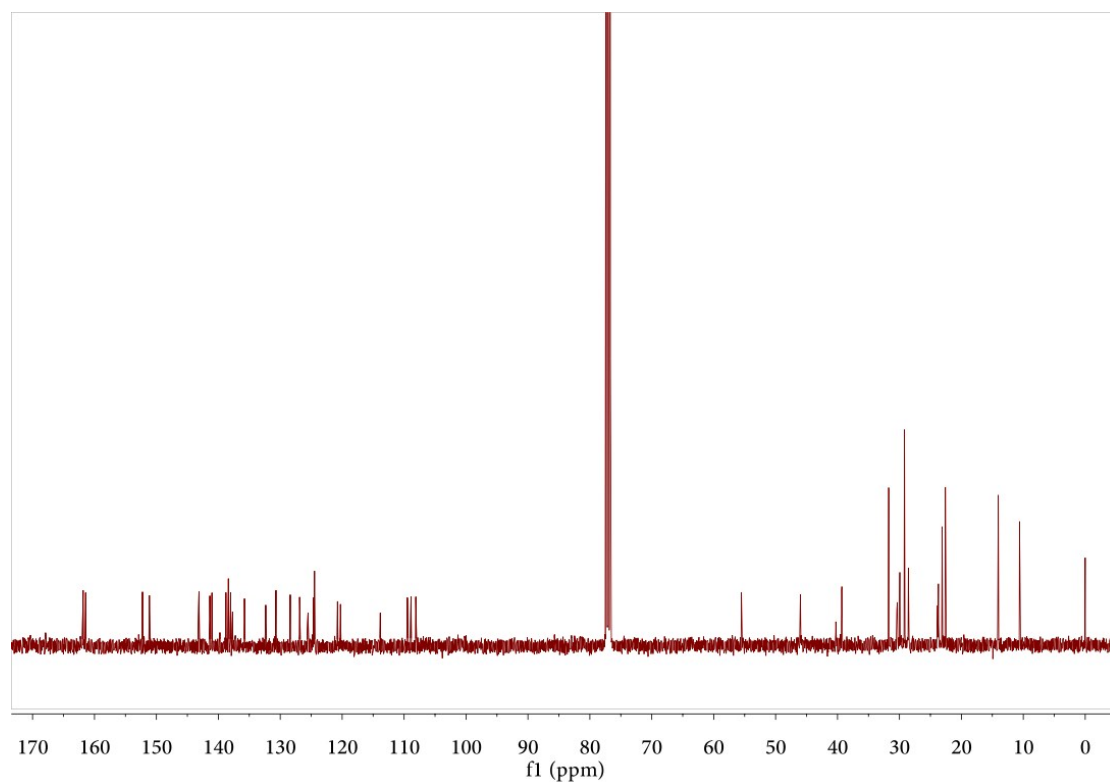

**Fig. S7**  $^{13}\text{C}$  NMR spectrum of F8-DPPTCN solution in  $\text{CDCl}_3$ .

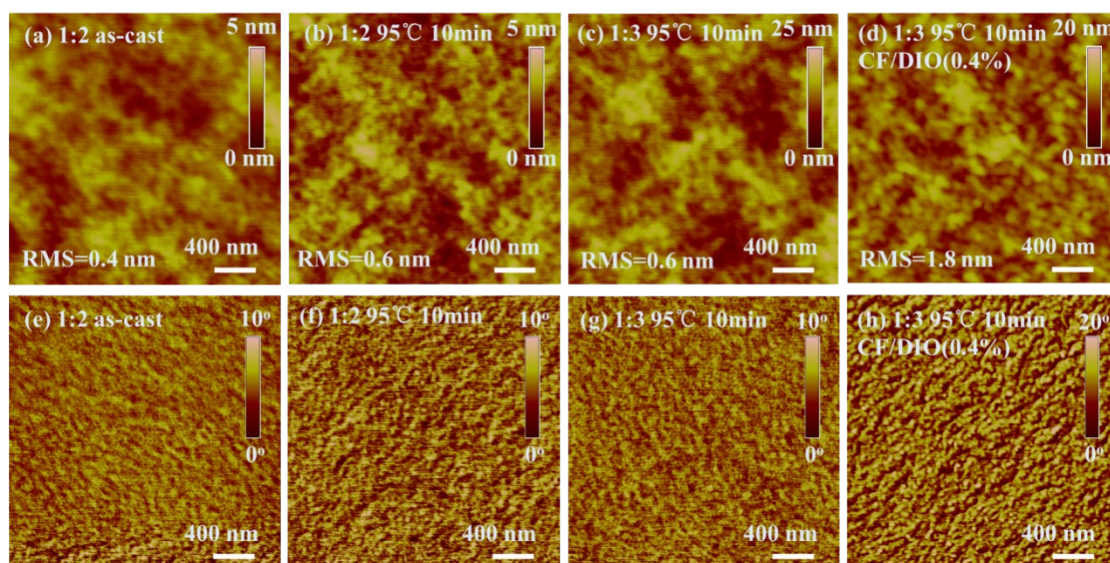

**Fig. S8** AFM height images (a, b, c and d) and phase images (e, f, g and h) of 1:2 as-cast (a, e), 1:2 annealed (b, f), 1:3 annealed (c, g) and 1:3 annealed DIO (d, h) films.

## References

1. F. Huang, H. Wu, D. Wang, W. Yang and Y. Cao, *Chem. Mater.*, 2004, **16**, 708-716.
